# Supplementary material for: A series of POM/Ag-based hybrids: distinct forms and assembly of [AgxLy] complexes through combinational effects of POM and isomeric ligands
Source: Royal Society of Chemistry journal article supplement (doi:10.1039/c2ce25979f), 2012-01-01
Supplement: c2ce25979f.pdf [file c2ce25979f.pdf]

## A series of POM/Ag-based hybrids: distinct forms and assembly of $[Ag_xL_y]$ complexes through combinational effects of POM and isomeric ligands

Min Zhu,<sup>†,‡</sup> Sheng-Qun Su,<sup>†,‡</sup> Xue-Zhi Song,<sup>†,‡</sup> Zhao-Min Hao,<sup>†,‡</sup> Shu-Yan Song,<sup>†</sup>  
Hong-Jie Zhang<sup>\*,†</sup>

<sup>†</sup>State Key Laboratory of Rare Earth Resource Utilization, Changchun Institute of Applied Chemistry, Chinese Academy of Sciences, 5625 Renmin Street, Changchun 130022, China

Tel: +86-431-85262127; Fax: +86-431-85698041; E-mail: [hongjie@ciac.jl.cn](mailto:hongjie@ciac.jl.cn)

<sup>‡</sup>Graduate School of the Chinese Academy of Sciences, Beijing, 100039, China

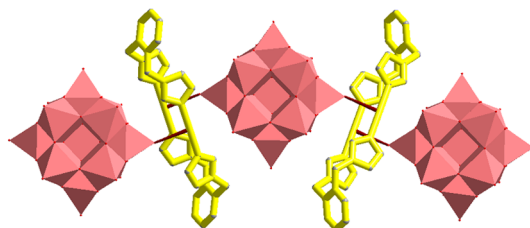

**Fig. S1** a) View of the 1D “S”-like chain in compound **1** (red bonds, Ag–O bonds).

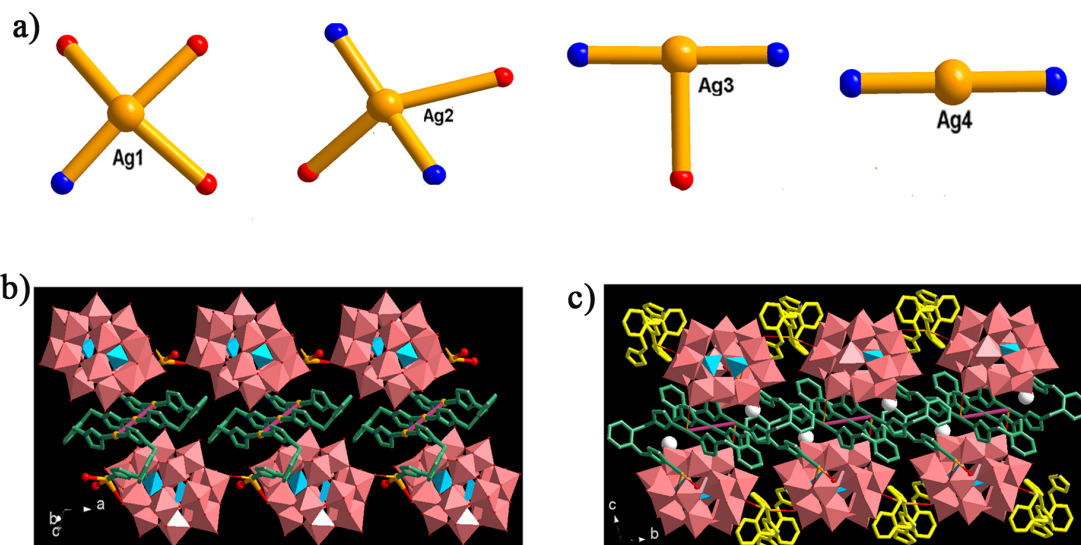

**Fig. S2** a) The coordination modes of four distinct Ag centers in compound **3**; b) View of the {Dawson-Ag<sub>5</sub>L<sup>a</sup><sub>4</sub>} double-chain structure; c) View of the Na<sup>+</sup> locating in the 2D layer structure (white ball, Na<sup>+</sup>).

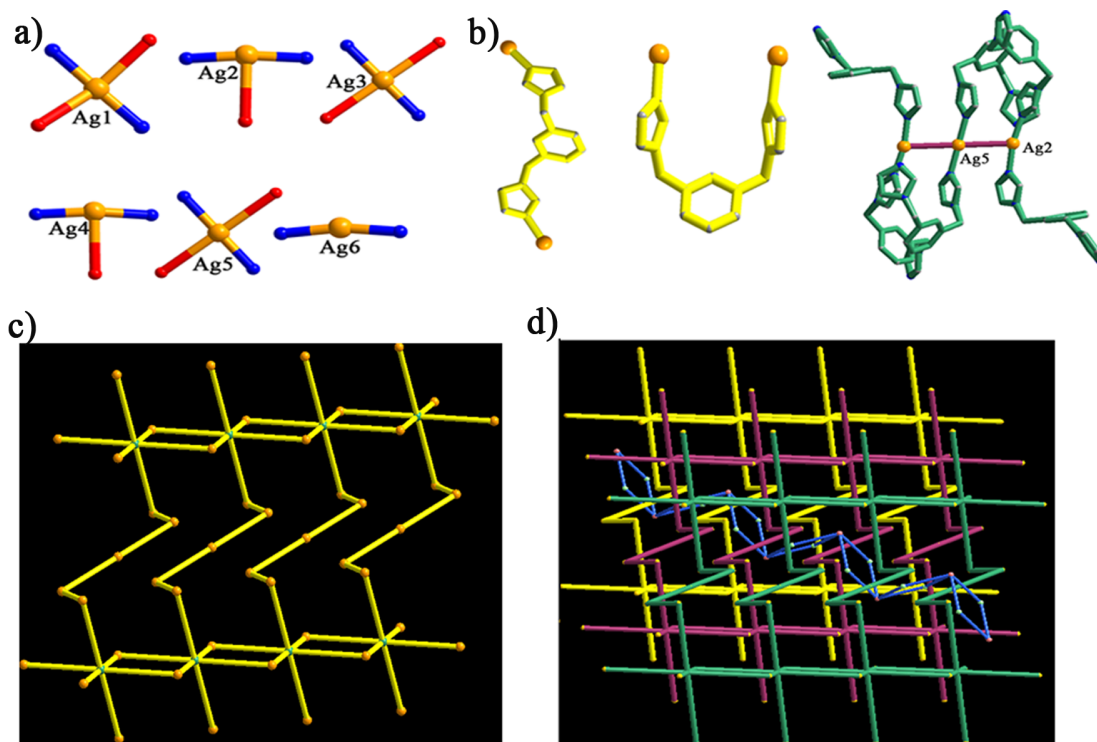

**Fig. S3** a) The coordination modes of six different Ag centers in compound **4**; b) two types of L<sup>b</sup> ligand (yellow) and Ag<sub>3</sub> trimer (green); c) the schematic view of the layer (green balls, Ag<sub>3</sub> trimers; yellow bonds, L<sup>b</sup> ligands; orange balls, the rest of Ag ions); d) a single {Dawson-K} chain going through interdigitated layers (blue chain, {Dawson-K} chain).

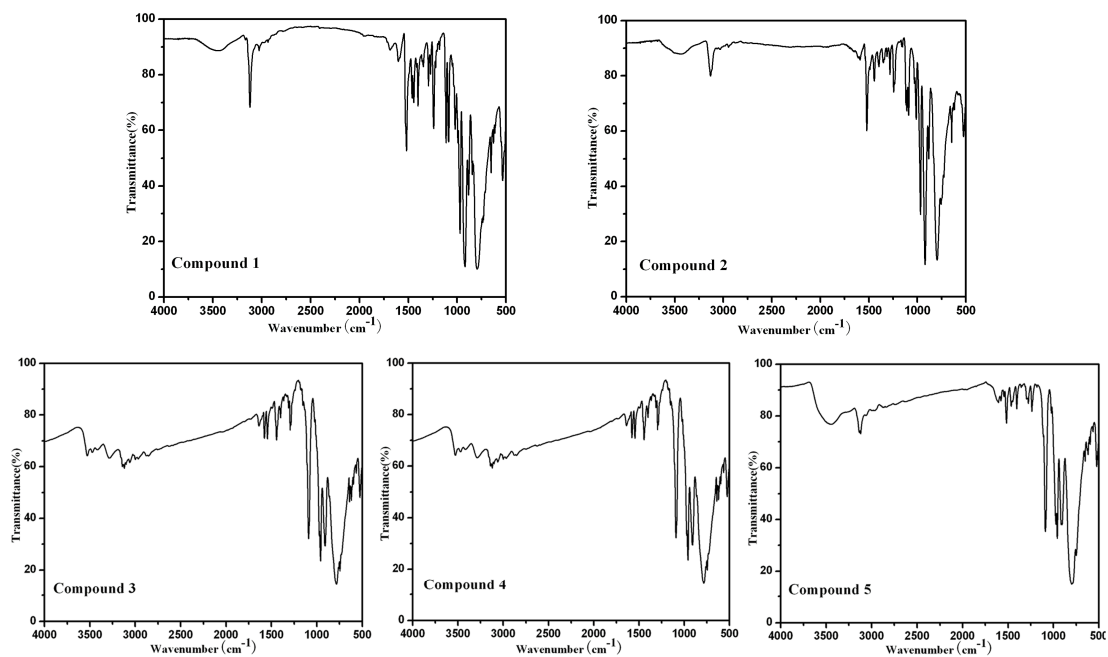

**Fig. S4** The IR spectra of compounds 1–5.

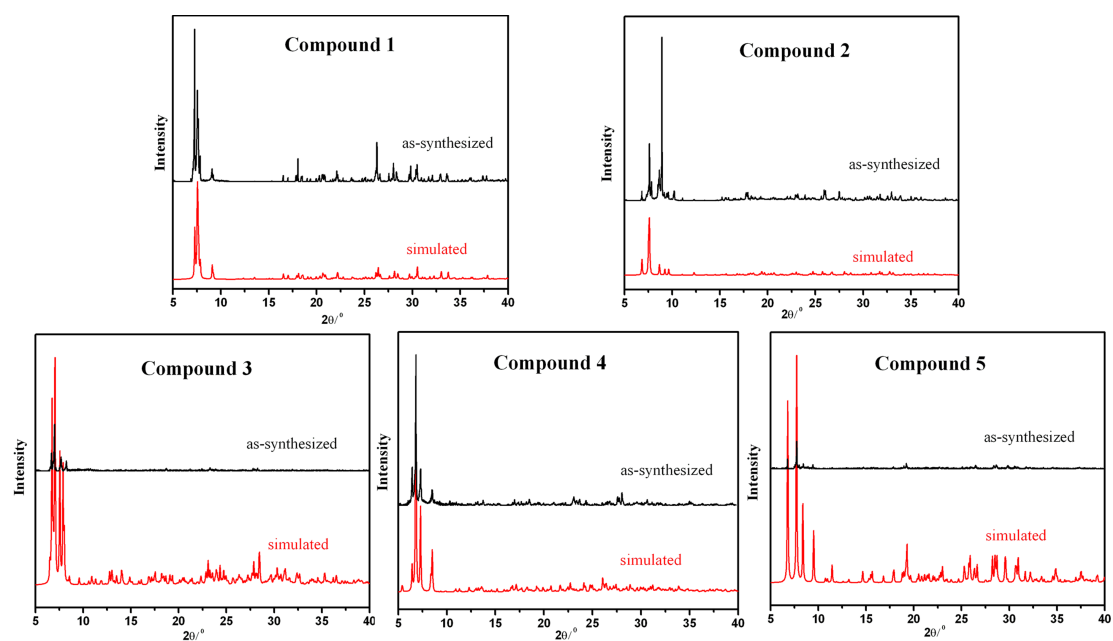

**Fig. S5** XRPD patterns of compounds 1–5.

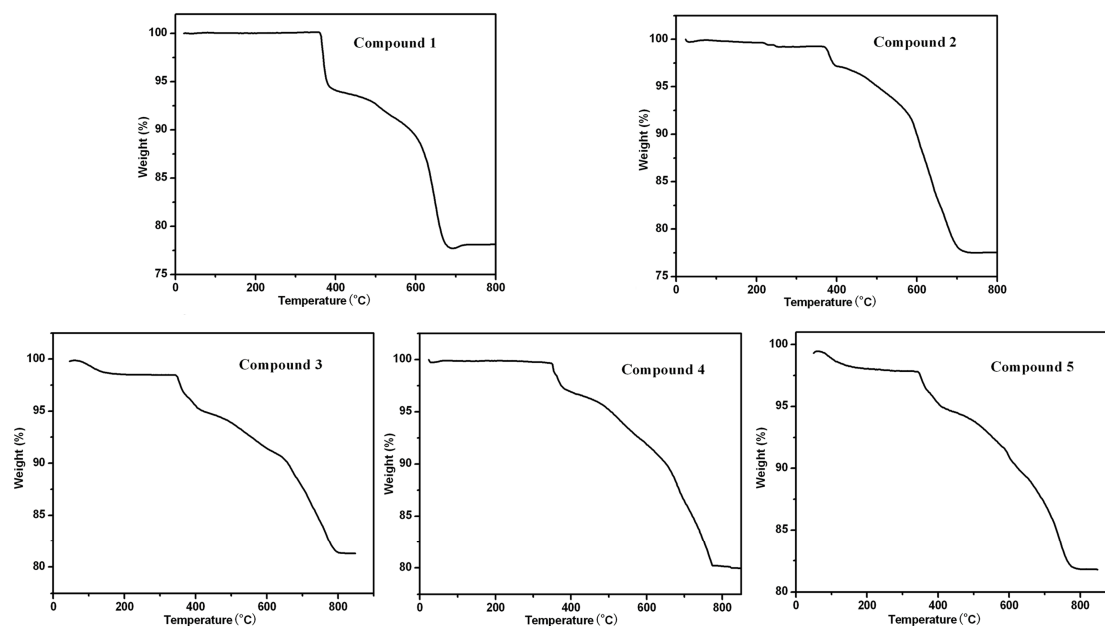

**Fig. S6** The TG analyses of compounds 1–5.

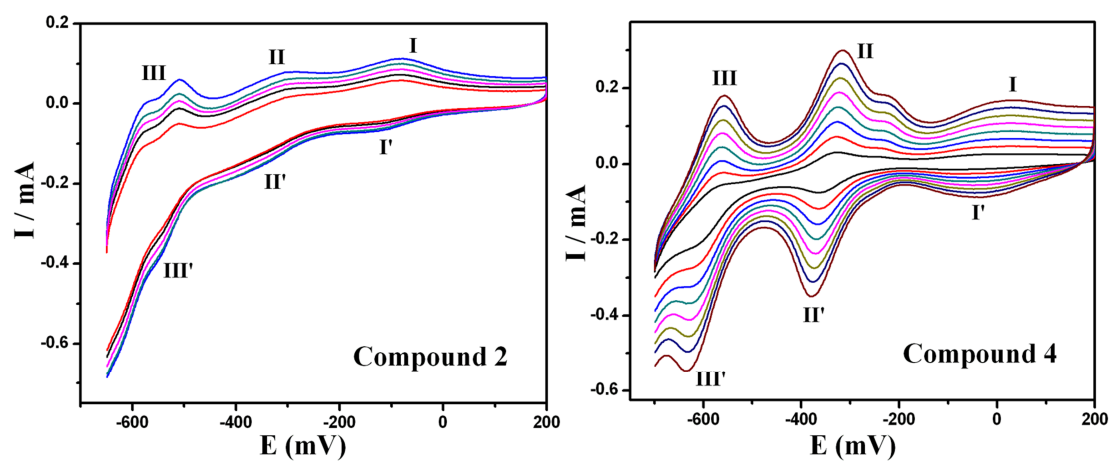

**Fig. S7** The cyclic voltammograms of 2-CPE and 4-CPE in 1 M H<sub>2</sub>SO<sub>4</sub> at different scan rates (from inner to outer: 10, 50, 100, 150, 200 mV·s<sup>-1</sup> for compound 2; 50, 100, 150, 200, 250, 300, 350, 400 mV·s<sup>-1</sup> for compound 4).

**Table S1.** Selected bond lengths (Å) and angles (°) for compounds 1–5.

| Compound 1      |          |                 |          |
|-----------------|----------|-----------------|----------|
| Ag(1)-N(3)      | 2.084(7) | Ag(1)-N(2)      | 2.086(7) |
| Ag(2)-N(5)      | 2.101(8) | Ag(2)-N(6)      | 2.135(7) |
| N(5)-Ag(2)-N(6) | 176.9(3) | N(2)-Ag(1)-N(3) | 179.5(3) |

| Compound 2            |            |                     |            |
|-----------------------|------------|---------------------|------------|
| Ag(3)-N(8)            | 2.053(7)   | Ag(3)-Ag(2)         | 3.0558(14) |
| Ag(2)-N(6)            | 2.108(8)   | Ag(2)-N(2)          | 2.114(8)   |
| Ag(2)-Ag(1)#3         | 3.2100(7)  | Ag(1)-N(3)          | 2.052(7)   |
| N(8)#6-Ag(3)-N(8)     | 180.000(3) | N(6)-Ag(2)-N(2)     | 170.2(3)   |
| N(3)-Ag(1)-N(3)#2     | 180.0 (5)  | Ag(3)-Ag(2)-Ag(1)#5 | 172.12(3)  |
| Ag(2)#3-Ag(1)-Ag(2)#4 | 180.0      |                     |            |
| Compound 3            |            |                     |            |
| Ag(4)-N(5)            | 2.106(17)  | Ag(4)-Ag(3)         | 3.346(2)   |
| Ag(3)-N(2)            | 2.09(2)    | Ag(3)-N(3)          | 2.147(18)  |
| Ag(1)-N(4)            | 2.17(2)    | Ag(1)-OW1           | 2.26(2)    |
| Ag(1)-O(54)           | 2.496(16)  | Ag(2)-N(10)         | 2.19(2)    |
| Ag(2)-N(20)           | 2.28(3)    | N(5)-Ag(4)-N(5)#1   | 180.0(10)  |
| Ag(3)-Ag(4)-Ag(3)#1   | 180.00(5)  | N(2)-Ag(3)-N(3)     | 173.6(7)   |
| N(4)-Ag(1)-OW1        | 173.2(8)   | N(4)-Ag(1)-O(54)    | 90.8(7)    |
| OW1-Ag(1)-O(54)       | 84.0(6)    | N(10)-Ag(2)-N(20)   | 168.5(10)  |
| Compound 4            |            |                     |            |
| Ag(1)-N(16)           | 2.100(12)  | Ag(1)-N(18)         | 2.130(12)  |
| Ag(1)-O(30)           | 2.579(9)   | Ag(2)-N(12)         | 2.086(11)  |
| Ag(2)-N(15)           | 2.090(10)  | Ag(2)-Ag(5)         | 3.3338(11) |
| Ag(3)-N(6)            | 2.096(11)  | Ag(4)-N(9)          | 2.120(11)  |
| Ag(4)-N(1)#2          | 2.127(10)  | Ag(5)-N(8)          | 2.121(11)  |
| Ag(6)-N(3)            | 2.087(14)  | Ag(6)-N(4)          | 2.107(13)  |
| O(57)-K(2)            | 2.471(9)   | O(39)-K(1)          | 2.509(10)  |
| N(9)-Ag(4)-N(1)#2     | 170.1(4)   | N(16)-Ag(1)-N(18)   | 175.3(5)   |
| N(16)-Ag(1)-O(30)     | 85.8(4)    | N(12)-Ag(2)-N(15)   | 169.1(4)   |
| N(3)-Ag(6)-N(4)       | 169.0(6)   | N(8)-Ag(5)-N(8)#3   | 180.000(2) |
| Compound 5            |            |                     |            |
| Ag(1)-N(1)            | 2.116(7)   | Ag(1)-N(2)          | 2.126(8)   |

|               |            |                 |          |
|---------------|------------|-----------------|----------|
| Ag(1)-Ag(1)#2 | 3.2379(16) | N(1)-Ag(1)-N(2) | 174.9(3) |
|---------------|------------|-----------------|----------|

Symmetry transformations used to generate equivalent atoms: #1  $-x, y, -z+3/2$ ; #2  $-x, -y, -z+1$ ; #3  $x, y-1, z$ ; #4  $x, y+1, z$  for **1**; #1  $-x+1, -y, -z+1$ ; #2  $-x, -y, -z+2$ ; #3  $x-1, y-1, z$ ; #4  $-x+1, -y+2, -z+2$ ; #5  $x+1, y+1, z$ ; #6  $-x, -y+1, -z+2$  for **2**; #1  $-x, -y, -z$ ; #2  $-x, -y-1, -z$  for **3**; #1  $-x+3, -y+2, -z-1$ ; #2  $-x+3, -y, -z-2$ ; #3  $-x+1, -y+1, -z-1$ ; #4  $-x+2, -y, -z-1$ ; #5  $x+1, y, z$ ; #6  $x-1, y, z$ ; #7  $-x+2, -y+1, -z-1$  for **4**; #1  $-x+1, -y, -z+1$ ; #2  $-x+3, -y, -z$  for **5**.
